# Supplementary material for: Global analysis of asymmetric RNA enrichment in oocytes reveals low conservation between closely related Xenopus species
Source: PubMed Central journal article supplement — Mol Biol Cell. 2015 Nov 1;26(21):3777–87. doi: 10.1091/mbc.E15-02-0115 (PMC4626063; doi:10.1091/mbc.e15-02-0115), 2015-11-01
Supplement: supp_E15-02-0115v1_CombinedSupMats.pdf [file supp_E15-02-0115v1_CombinedSupMats.pdf]

# Supplemental Materials

*Molecular Biology of the Cell*

Claußen et al.

Supplementary figures and tables

early pathway

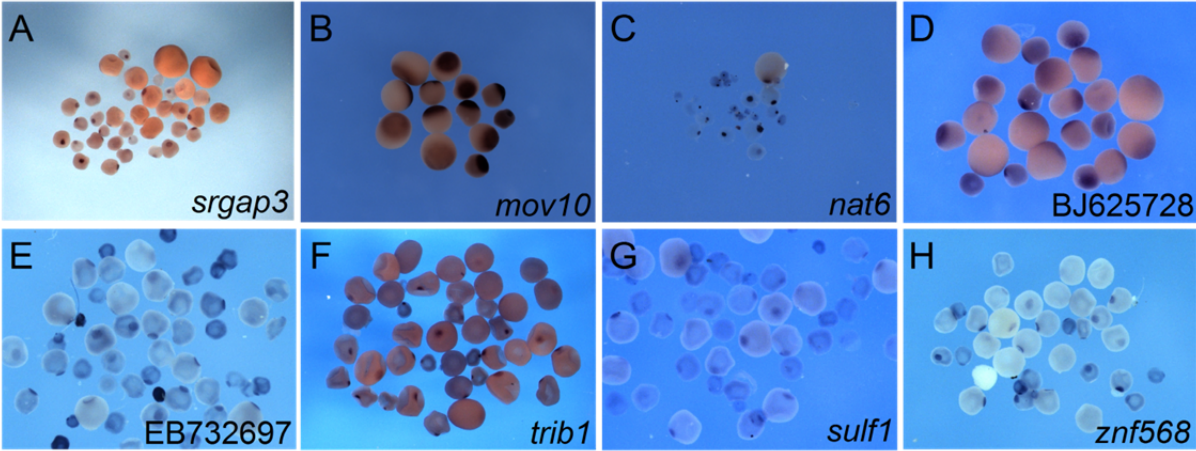

late pathway

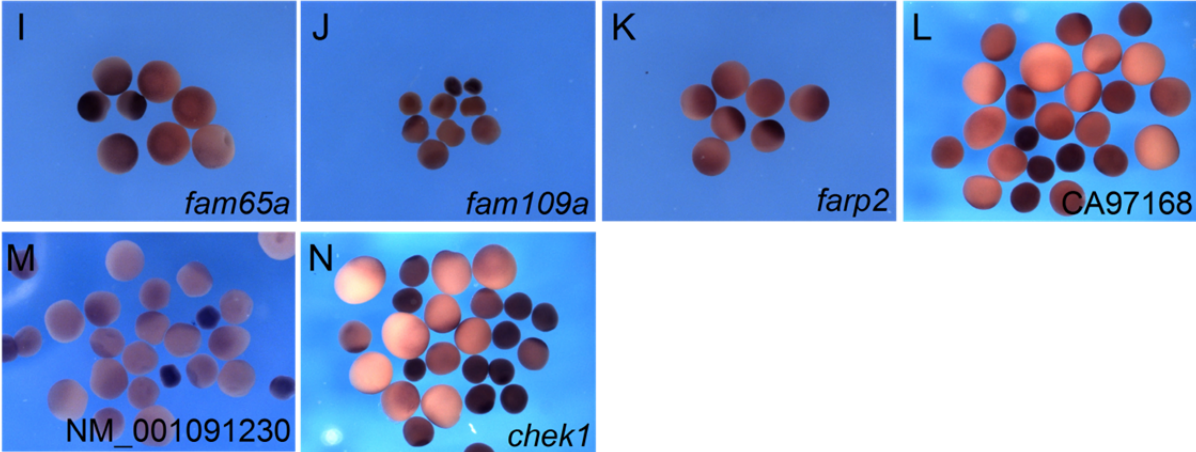

not localized/low expression

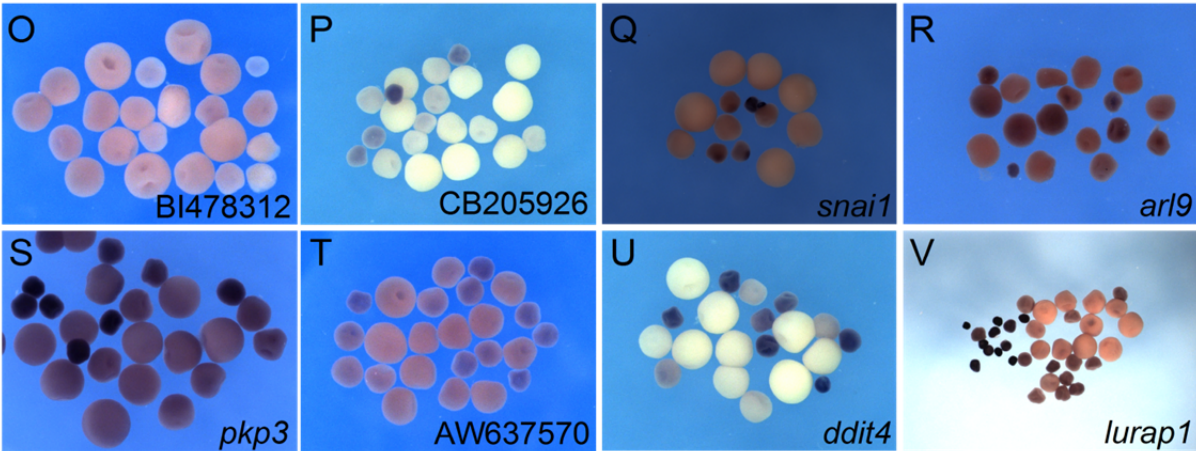

**Figure S1.** *In situ* hybridization analysis of novel vegetally enriched candidate RNAs in *X. laevis*. RNA distribution in *X. laevis* oocytes was detected by *in situ* hybridization. (A-H) Early pathway/mitochondrial cloud localization has been detected for *srgap*, *mov10*, *nat6*, BJ625728, EB732697, *trib1*, *sulf1* and *znf568* in stage I-III oocytes. (I-N) Late pathway localization was observed for *fam65a*, *fam109a*, *farp2*, CA97168, NM\_001091230 and *check1* transcripts. Stage II-IV oocytes are shown. (O-V) No vegetal enrichment or very weak expression levels were observed for BI478312, CB205926, *snai1*, *arl9*, *pkp3*, AW637570, *ddit4* and *lurap1*. Stage I-IV oocytes are shown.

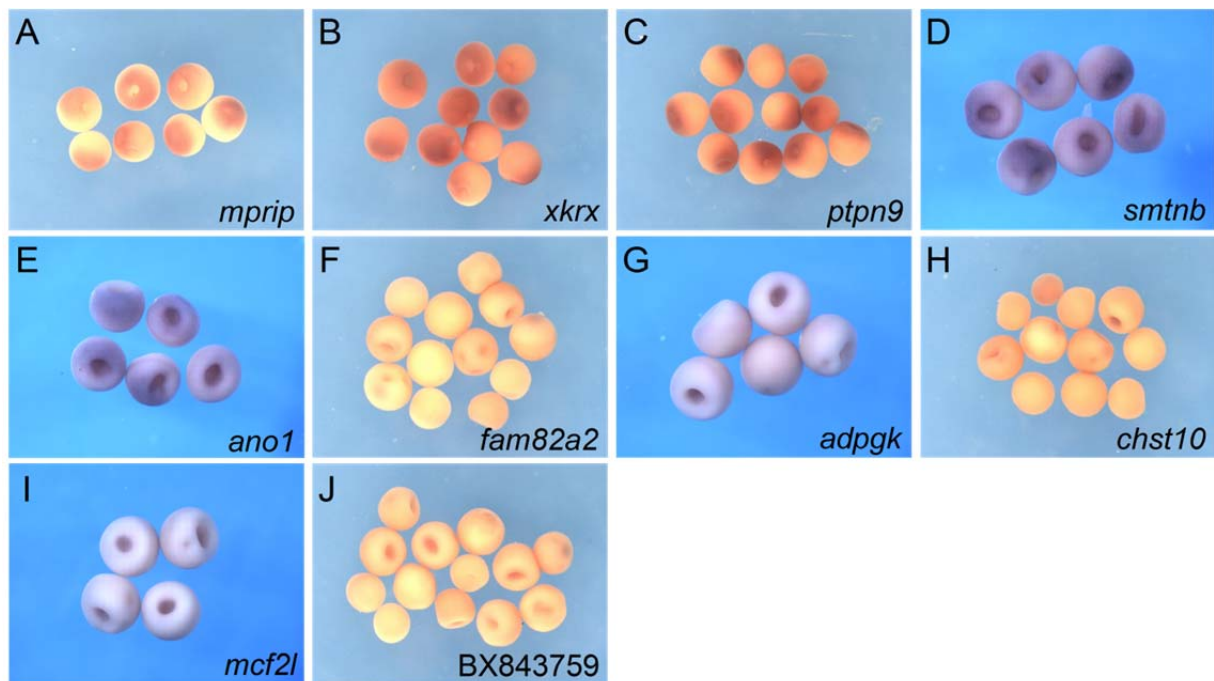

**Figure S2.** Expression and localization of novel animally enriched candidate RNAs in *X. laevis*. (A-E) *In situ* hybridization reveals enrichment of *mrip*, *xkrx*, *ptpn9*, *smtnb* and *ano1* transcripts in the animal hemisphere of stage VI *X. laevis* oocytes. (F-J) No animal enrichment or very weak expression levels were detected for *fam82a2*, *adpgk*, *chst10*, *mcf2l* and BX843759 transcripts.

### Scatter plot Animal vs Vegetal

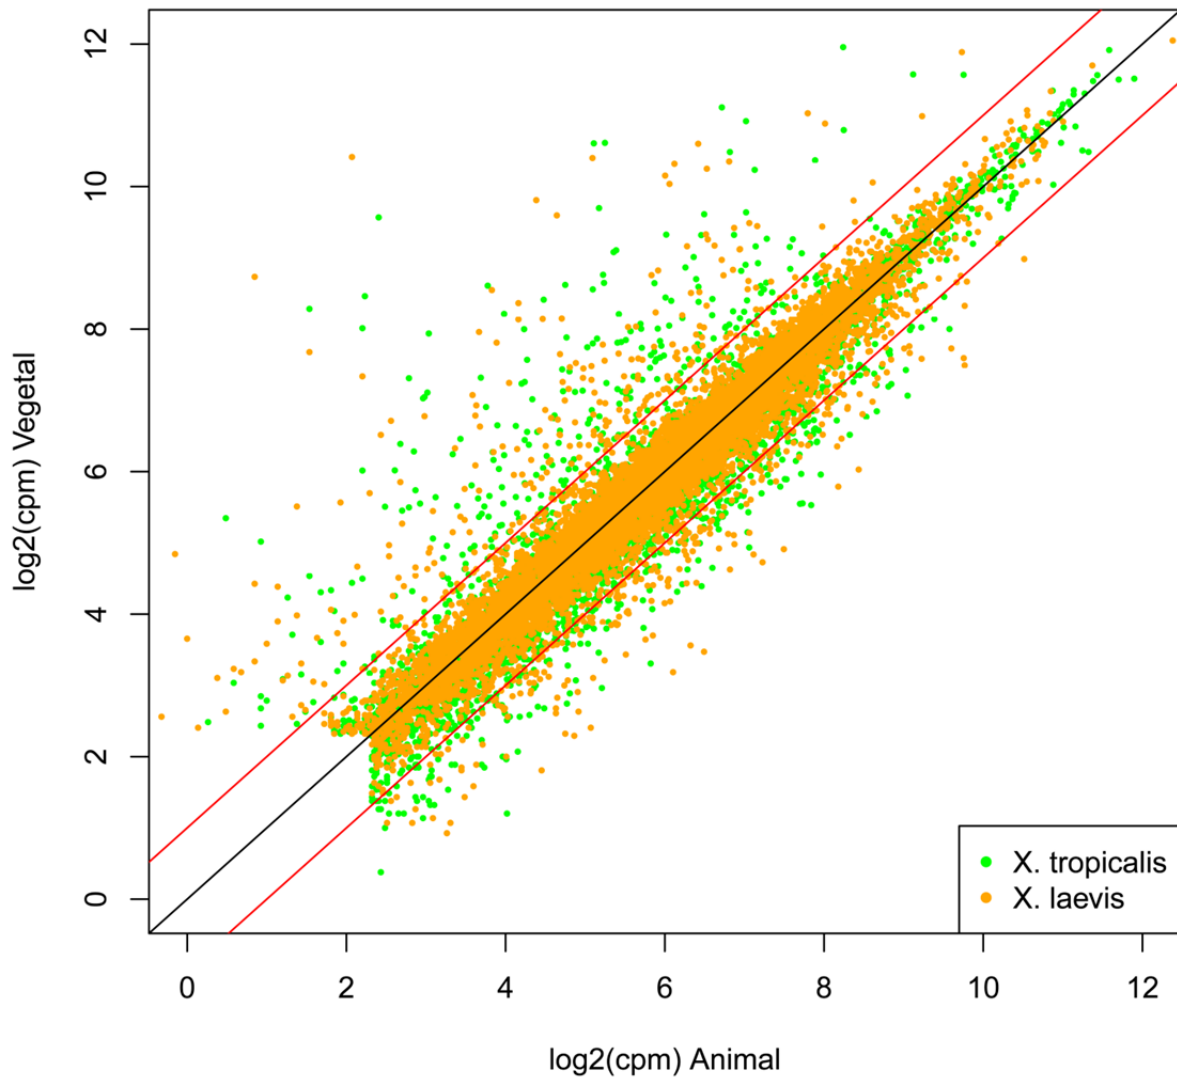

**Figure S3.** Comparison of transcript levels for vegetal and animal halves from *X. laevis* (orange) and *X. tropicalis* (green) oocytes. Expression values correspond to logarithmic, normalized average read counts (cpm) for each gene from animal and vegetal samples. The black line denotes identical values for animal and vegetal samples, the red lines denote 2-fold changes of RNA levels in either animal or vegetal samples. This comparative analysis was restricted to transcripts identified in both species.

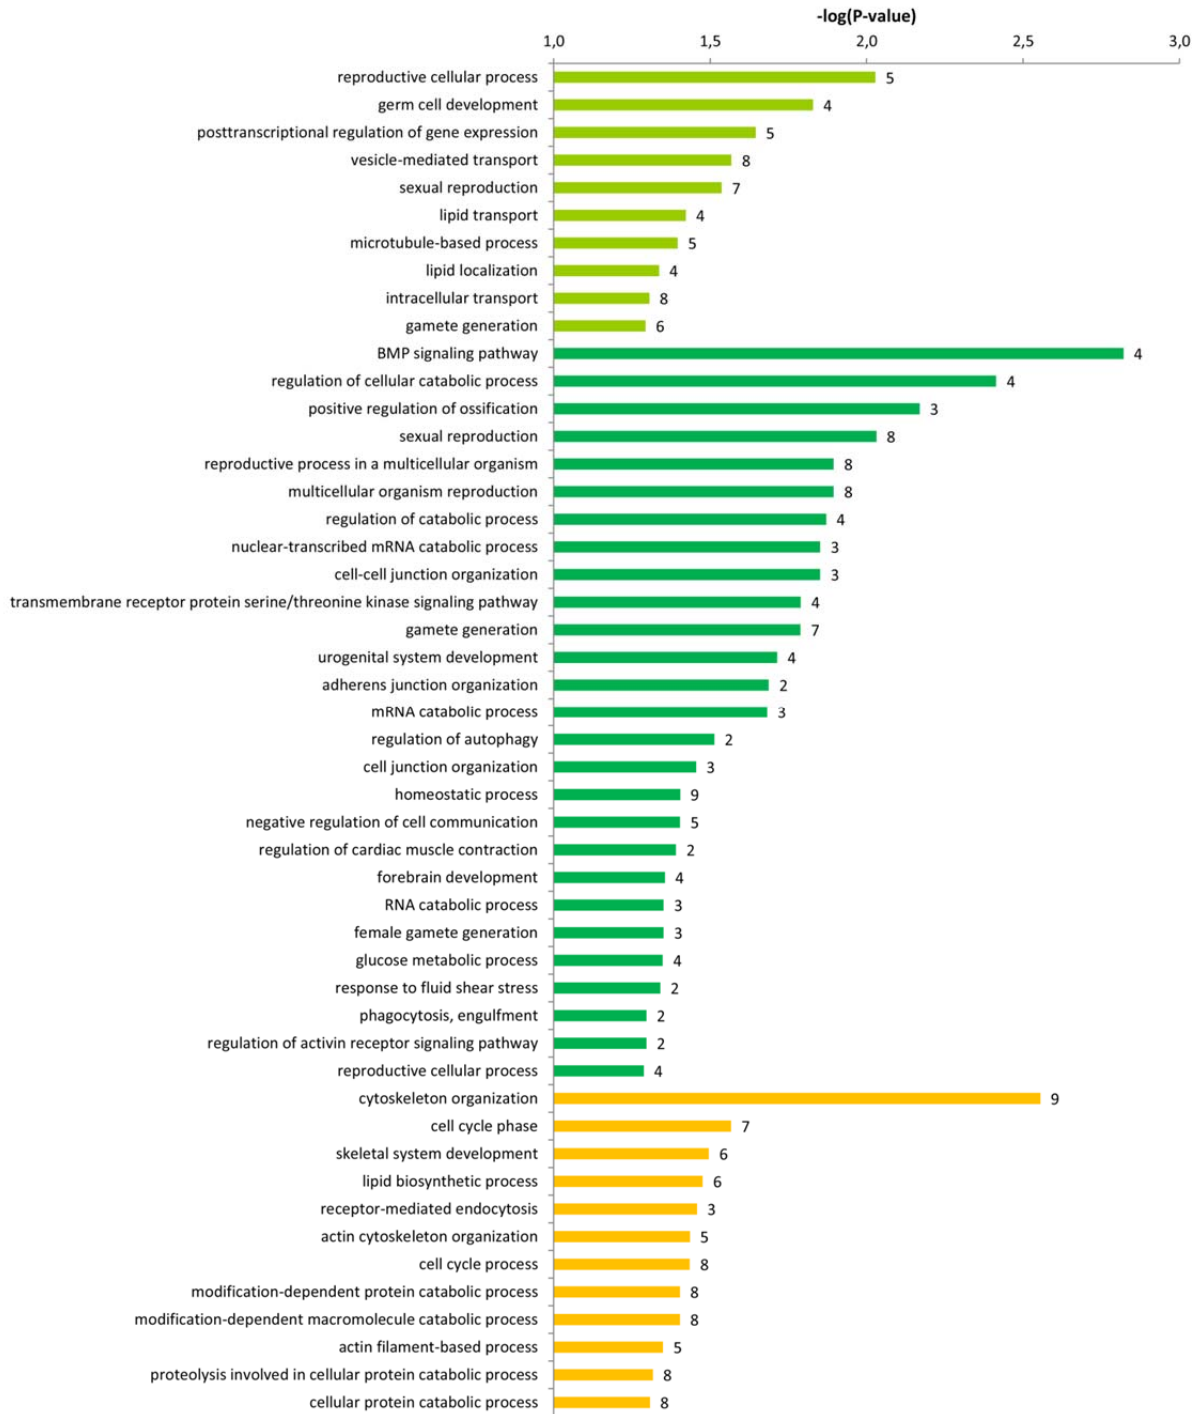

**Figure S4.** GO analysis of vegetally enriched transcripts. Enrichment of genes associated with various biological processes are expressed as  $-\log(P\text{-values})$  and shown for transcripts with conserved vegetal enrichment (light green) as well as species-specific vegetal enrichment in *X. laevis* (dark green) and *X. tropicalis* (orange). Biological process functional annotation terms (BP\_FAT) with  $p\text{-values} \leq 0,05$  are listed. Numbers of genes associated with a given process are indicated. Only transcripts with expression in oocytes from both species were considered.

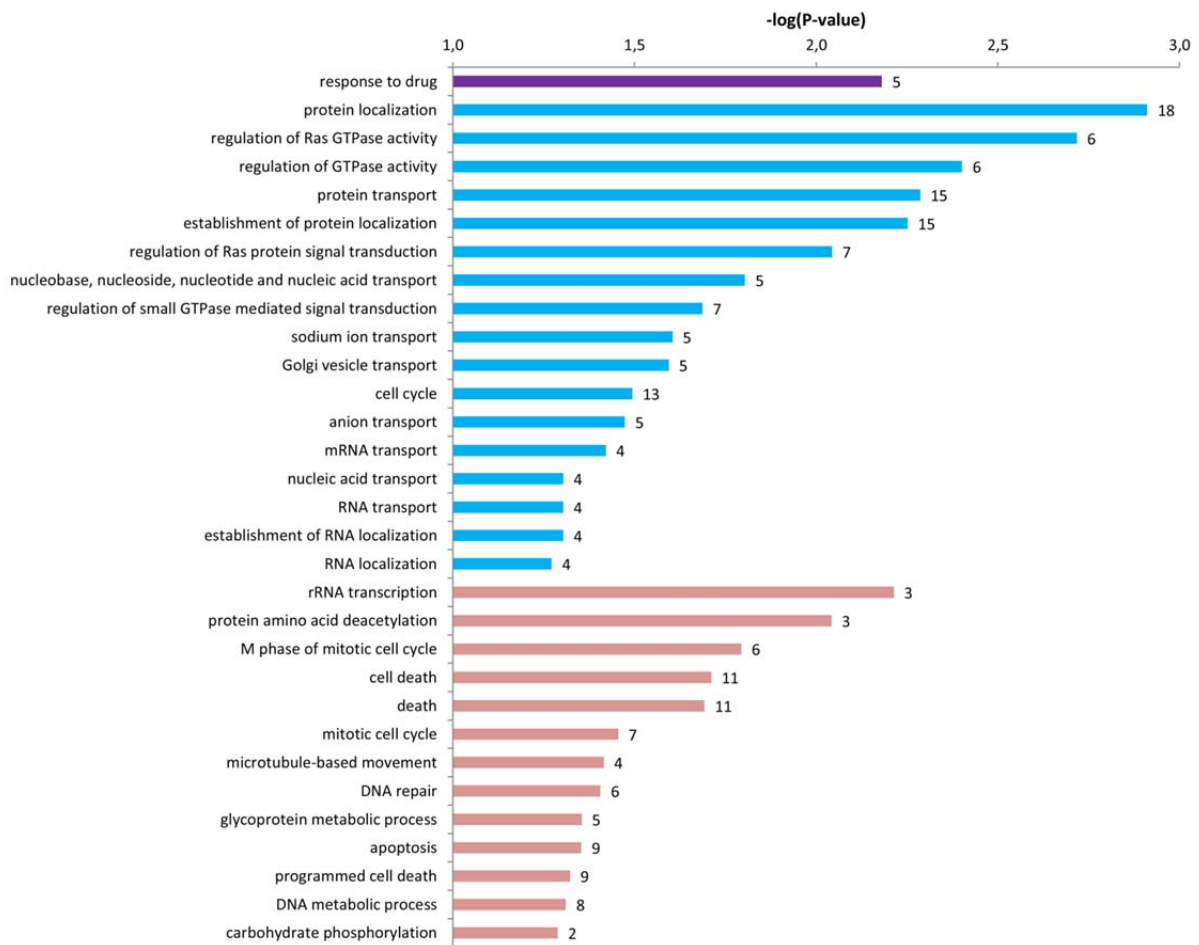

**Figure S5.** GO analysis of animally enriched transcripts. Enrichment of genes associated with various biological processes are expressed as  $-\log(P\text{-values})$  and shown for transcripts with conserved animal enrichment (purple) as well as species-specific animal enrichment in *X. laevis* (blue) and *X. tropicalis* (mauve). Biological process functional annotation terms (BP\_FAT) with  $p\text{-values} \leq 0,05$  are listed. Numbers of genes associated with a given process are indicated. Only transcripts with expression in oocytes from both species were considered.

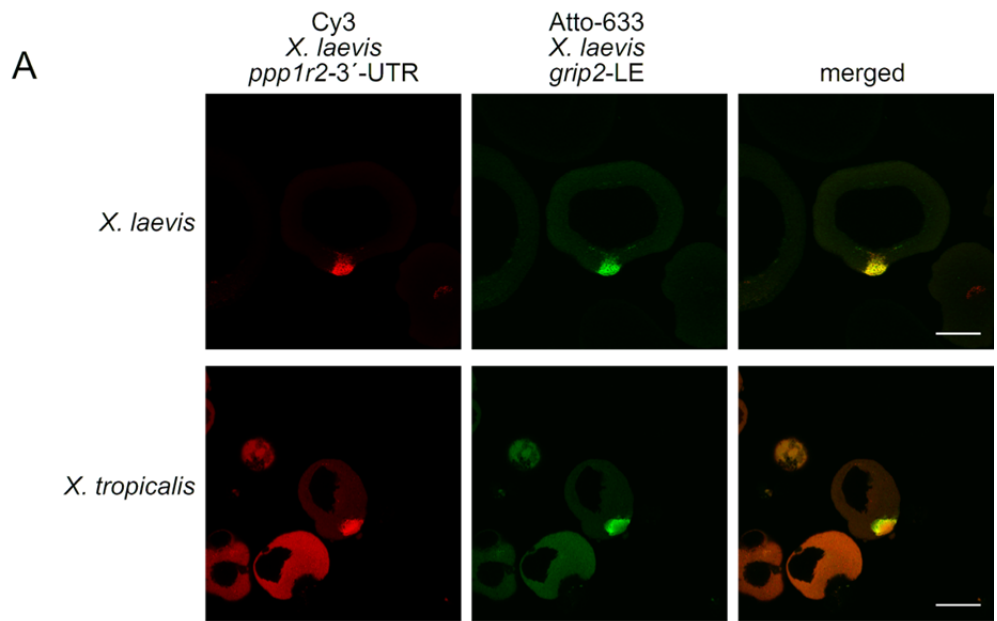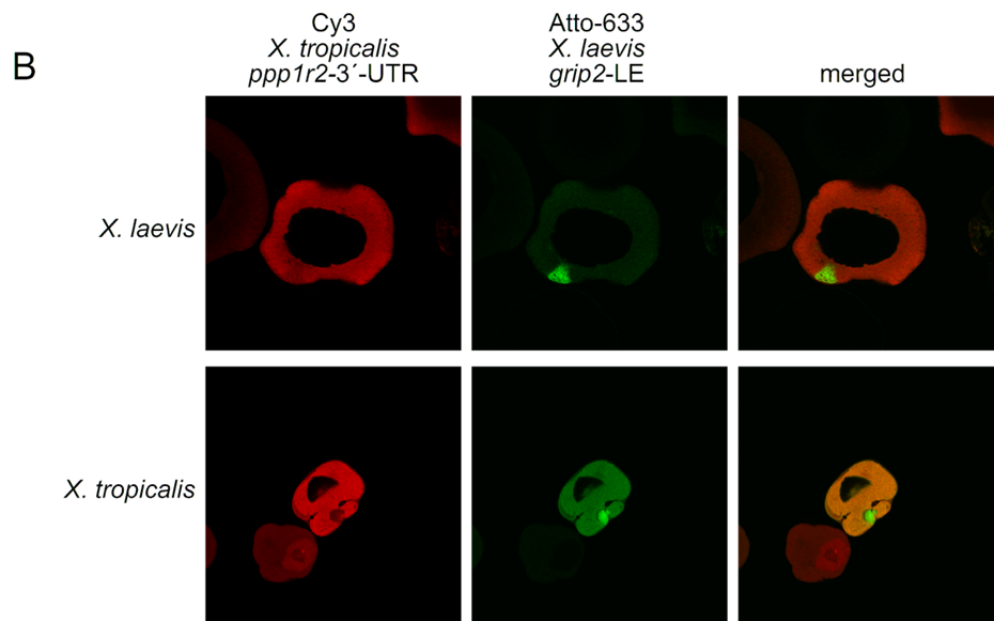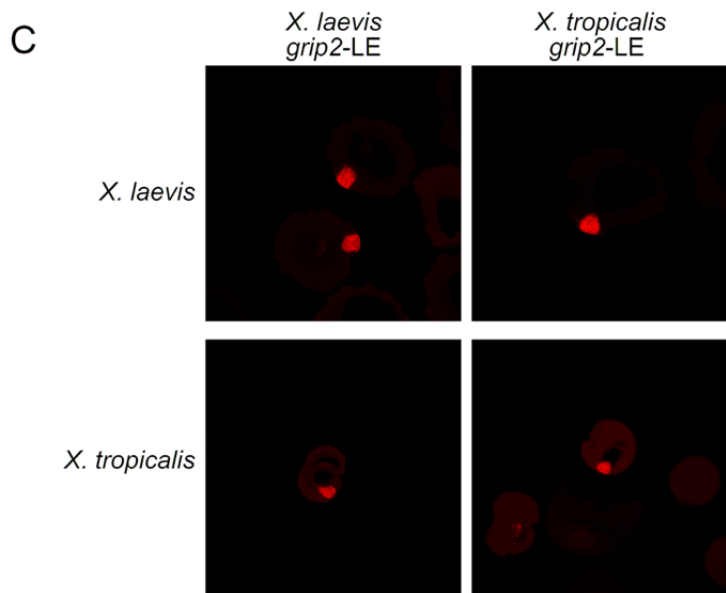

**Figure S6.** Early pathway localization of *ppp1r2* 3'-UTRs and *grip2*-LEs after injection into stage I oocytes from *X. laevis* and *X. tropicalis*. (A) Co-injection of Cy3-labelled *X. laevis ppp1r2*-3'-UTR and Atto633-labelled *X.laevis grip2*-LE into oocytes from *X. laevis* and *X. tropicalis*. (B) Co-injection of Cy3-labelled *X. tropicalis ppp1r2*-3'-UTR and Atto633-labelled *X.laevis grip2*-LE into oocytes from both species. (C) Injection of Cy3-labelled *X. laevis* and *X. tropicalis grip2*-LEs into stage I oocytes from *X. laevis* and *X. tropicalis*. Scale bars approximate 100  $\mu$ m. Settings of the confocal imaging were adjusted to fit the requirements for imaging the oocyte in the center of the image. Additional oocytes present in the image may thus be over- or under exposed or do not represent the appropriate focal plane for imaging the mitochondrial cloud.

**Table S1.** Summary of RNA sequencing results for known vegetally localizing mRNAs.

| pathway                    | gene symbol   | gene name                                              | UnigenelD | RNA seq | qPCR | reference                                         |
|----------------------------|---------------|--------------------------------------------------------|-----------|---------|------|---------------------------------------------------|
| vegetal early/intermediate | <i>grip2</i>  | glutamate receptor interacting protein 2               | Xl.64243  | 8,34    | ND   | Kaneshiro et al., 2007; Tarbashevich et al., 2007 |
|                            | <i>nanos1</i> | nanos homolog 1                                        | Xl.1145   | 7,49    | ND   | Mosquera et al., 1993                             |
|                            | <i>germes</i> | germes                                                 | Xl.7252   | 6,14    | ND   | Berekelya et al., 2003                            |
|                            | <i>wnt11b</i> | wingless-type MMTV integration site family, member 11B | Xl.24008  | 5,56    | ND   | Ku and Melton, 1993;                              |
|                            | <i>trim36</i> | tripartite motif containing 36                         | Xl.6926   | 5,41    | ND   | Cuykendall and Houston, 2009                      |
|                            | * <i>dazl</i> | deleted in azoospermia-like                            | Xl.311    | 5,07    | ND   | Houston et al., 1998; Sekizaki et al., 2004       |
|                            | <i>ddx25</i>  | DEAD box helicase 25                                   | Xl.670    | 4,94    | ND   | MacArthur et al., 2000                            |
|                            | <i>sybu</i>   | syntabulin                                             | Xl.8441   | 4,71    | ND   | Colozza and De Robertis, 2014                     |
|                            | <i>acs11</i>  | acyl-CoA synthetase long-chain family member 1         | Xl.7122   | 4,12    | ND   | King, 1995; Kloc et al., 2002; Wang et al., 2012  |
|                            | <i>pgat</i>   | Primordial germ cell-associated transcript protein     | Xl.38     | 4,09    | ND   | Hudson and Woodland, 1998                         |
|                            | <i>pcsk6</i>  | proprotein convertase subtilisin/kexin type 6          | Xl.48635  | 3,99    | ND   | Birsoy et al., 2005                               |
|                            | <i>efnb1</i>  | efhrin-B1                                              | Xl.302    | 3,30    | ND   | Betley et al., 2002                               |
|                            | <i>otx1</i>   | orthodenticle homeobox 1                               | Xl.781    | 3,17    | ND   | Pannese et al., 2000                              |
|                            | <i>rtn3</i>   | reticulon 3                                            | Xl.57382  | 2,56    | ND   | Cuykendall and Houston, 2010                      |
|                            | <i>kif13b</i> | kinesin family member 13B                              | Xl.55605  | 2,37    | ND   | Tarbashevich et al., 2011                         |
|                            | <i>ctdapl</i> | CTD small phosphatase-like                             | Xl.18931  | 2,21    | ND   | Claufen et al., 2004                              |
|                            | <i>plin2</i>  | perilipin 2                                            | Xl.29614  | 2,15    | ND   | Chan et al., 1999                                 |
|                            | <i>rbms2</i>  | RNA binding protein with multiple splicing 2           | Xl.449    | 1,75    | ND   | Zearfoss et al., 2004                             |
|                            | <i>ddx59</i>  | dead box polypeptide 59                                | Xl.3767   | 1,32    | ND   | Kloc and Chan, 2007                               |
|                            | <i>exd2</i>   | exonuclease 3'-5' domain containing 2                  | Xl.7151   | -2,18   | ND   | Cuykendall and Houston, 2010                      |
| vegetal late               | <i>gdf1</i>   | growth differentiation factor 1                        | Xl.25780  | 5,32    | 4,49 | Weeks and Melton, 1987                            |
|                            | <i>dnd1</i>   | DND microRNA-mediated repression inhibitor 1           | Xl.29785  | 4,33    | 3,88 | Horvay et al., 2006                               |
|                            | * <i>vegt</i> | vegt protein                                           | Xl.1775   | 4,22    | 3,56 | Zhang and King, 1996; D'Souza et al., 2002        |
|                            | <i>spire1</i> | spire homolog 1                                        | Xl.7501   | 3,73    | ND   | Le Goff et al., 2006                              |
|                            | <i>velo1</i>  | velo1 protein                                          | Xl.491    | 3,23    | ND   | Claufen and Pieler, 2004                          |
|                            | <i>bicc1</i>  | bicaudal C homolog 1                                   | Xl.641    | 2,92    | ND   | Wesseley and De Robertis, 2000                    |
|                            | <i>zfp362</i> | ZFP36 ring finger protein-like 2                       | Xl.23743  | 1,84    | ND   | Betley et al., 2002                               |
|                            | <i>ldlrp1</i> | low density lipoprotein receptor adapter protein 1     | Xl.8355   | 0,70    | ND   | Zhou et al., 2004                                 |

Relative vegetal enrichment as revealed by RNA sequencing analysis (expressed as log2FC) is indicated for previously reported vegetally localizing transcripts only. Vegetally enriched RNAs, for which vegetal cortex localization had been approved by *in situ* hybridization analysis, were considered. Documented vegetal enrichment in *X. tropicalis* oocytes is indicated by asterisks. Vegetally localizing RNAs are grouped into early or late pathway RNAs and sorted according to descending enrichment in the vegetal hemisphere of *X. laevis* oocytes. The two examples for vegetal enrichment below the threshold of  $\log_2FC \geq 1$  (*exd2* and *ldlrp1*) are marked in red.



**Table S3.** Summary of RNA sequencing results for published, animally enriched mRNAs.

| gene symbol     | gene name                                                | UnigenelD | RNA seq | qPCR  | reference                                       | note |
|-----------------|----------------------------------------------------------|-----------|---------|-------|-------------------------------------------------|------|
| <i>tnfaip1</i>  | tumor necrosis factor, alpha-induced protein 1           | XI.24189  | -1,89   | ND    | Grant et al., 2014                              | #    |
| <i>srebj2</i>   | sterol regulatory element binding transcription factor 2 | XI.78417  | -1,48   | ND    | Grant et al., 2014                              | #    |
| <i>nup93</i>    | nucleoporin 93kDa                                        | XI.98     | -1,20   | ND    | Hudson et al. 1996                              | \$   |
| <i>aurka</i>    | aurora kinase A                                          | XI.124    | -1,17   | ND    | Grant et al., 2014                              | #    |
| <i>smcr7l</i>   | Smith-Magenis syndrome chrom. reg., cand. 7-like         | XI.78192  | -1,12   | ND    | Grant et al., 2014                              | #    |
| <i>atxn7</i>    | ataxin 7                                                 | XI.29665  | -1,10   | ND    | Grant et al., 2014                              | #    |
| <i>c17orf63</i> | chromosome 17 open reading frame 63                      | XI.54800  | -1,01   | ND    | Grant et al., 2014                              | #    |
| <i>mark3</i>    | MAP/microtubule affinity-regulating kinase 3             | XI.1967   | -0,72   | ND    | Ossipova et al., 2002                           | #    |
| <i>mcm6</i>     | minichromosome maintenance complex component 6           | XI.3661   | -0,45   | ND    | Kloc et al., 1991                               | \$   |
| <i>wbp2nl</i>   | WBP2 N-terminal like                                     | XI.76974  | -0,27   | ND    | Grant et al., 2014                              | #    |
| <i>ddx3x</i>    | DEAD box helicase 3                                      | XI.60716  | -0,26   | -0,30 | Rebagliati et al., 1985; Gururajan et al., 1991 |      |
| <i>oct60</i>    | POU class V protein oct-60                               | XI.53382  | -0,25   | ND    | Whitfield et al., 1993                          | #    |
| <i>phax</i>     | phosphorylated adaptor for RNA export                    | XI.13915  | -0,22   | ND    | Snedden et al., 2013                            |      |
| <i>gnb1</i>     | G-protein beta subunit                                   | XI.4840   | -0,21   | ND    | Devic et al. 1996                               |      |
| <i>dnah9</i>    | dynein, axonemal, heavy chain 9                          | XI.21651  | -0,16   | ND    | Vick et al., 2009                               | #    |
| <i>abl2</i>     | abl-interactor 2                                         | XI.956    | -0,06   | ND    | Reddy et al., 1992                              | \$   |
| <i>atp5a1</i>   | mitochondrial ATP Synthase subunit                       | XI.8876   | -0,05   | ND    | Rebagliati et al., 1985; Weeks and Melton, 1987 | \$   |
| <i>trim33</i>   | tripartite motif containing 33                           | XI.57890  | -0,04   | ND    | Dupont et al., 2005                             | #    |
| <i>zfanf4</i>   | zinc finger, AN1-type domain 4                           | XI.865    | 0,01    | 0,00  | Rebagliati et al., 1985; Linnen et al., 1993    | \$   |
| <i>pabpc1</i>   | poly(A) binding protein, cytoplasmic 1                   | XI.35547  | 0,12    | ND    | Schroeder and Yost, 1996                        |      |
| <i>igf2bp3</i>  | insulin-like growth factor 2 mRNA binding protein 3      | XI.319    | 0,14    | ND    | Zhang et al., 1999                              |      |
| <i>tcf7</i>     | transcription factor 7 (T-cell specific, HMG-box)        | XI.3962   | 0,16    | ND    | Roel et al., 2003                               | #,*  |
| <i>ets1</i>     | avian erythroblastosis virus E26 oncogene homolog 1      | XI.1148   | 0,20    | ND    | Meyer et al., 1997                              |      |
| <i>csnk2a1</i>  | casein kinase 2, alpha 1 polypeptide                     | XI.11560  | 0,24    | ND    | Imbrie et al., 2012                             |      |
| <i>fn1</i>      | fibronectin 1                                            | XI.2243   | 0,73    | ND    | Oberman and Yisraeli, 1995                      |      |

Relative animal enrichment as revealed by RNA sequencing or qPCR analysis is indicated for transcripts with animal enrichment published previously. Transcripts, for which differential localization has been described for the zygote or early embryo, but not for oocytes, are marked (#). Transcripts for which in situ hybridization data are missing are indicated (\$) . Documented animal enrichment in *X. tropicalis* is indicated by an asterisk (\*). RNAs are sorted by descending enrichment in the animal hemisphere of *X. laevis* oocytes. Values above the threshold for animal enrichment of  $\log_2FC \leq -1$  are indicated in red.

**Table S9.** Quantification of vegetal localization of injected RNA

| injected RNA                            | <i>X. laevis</i> oocytes |      |    |      | <i>X. tropicalis</i> oocytes |      |    |      |
|-----------------------------------------|--------------------------|------|----|------|------------------------------|------|----|------|
|                                         | ratio Veg/An             | SDEV | N  | SEM  | ratio Veg/An                 | SDEV | N  | SEM  |
| <i>X.l. gdf1</i> -LE                    | 8,21                     | 3,50 | 17 | 0,85 | 5,40                         | 3,07 | 24 | 0,63 |
| <i>X. t. gdf1</i> -LE                   | 3,07                     | 0,76 | 8  | 0,27 | 4,76                         | 2,44 | 18 | 0,57 |
| <i>X.l. grip2</i> -LE                   | 5,82                     | 1,47 | 12 | 0,42 | 5,52                         | 2,90 | 15 | 0,75 |
| <i>X.t. grip2</i> -LE                   | 7,56                     | 3,13 | 11 | 0,94 | 5,51                         | 2,14 | 15 | 0,55 |
| <i><math>\beta</math>-globin</i> 3'-UTR | 0,94                     | 0,25 | 26 | 0,05 | 0,79                         | 0,20 | 22 | 0,04 |
| <i>X.l.ppp1r2</i> 3'-UTR                | 12,39                    | 8,84 | 18 | 2,08 | 5,31                         | 2,95 | 22 | 0,63 |
| <i>X.t.ppp1r2</i> 3'-UTR                | 1,00                     | 0,38 | 18 | 0,09 | 0,85                         | 0,22 | 22 | 0,05 |
| <i>X.l. acp6</i> 5'-UTR                 | 6,95                     | 1,85 | 18 | 0,44 | 4,27                         | 1,42 | 8  | 0,50 |
| <i>X.t. acp6</i> 5'-UTR                 | 5,33                     | 1,84 | 20 | 0,41 | 4,08                         | 1,64 | 13 | 0,46 |

Mean pixel intensities at the vegetal cortex and in the animal cytoplasm were quantified and average Veg/An ratios are listed. SDEV, standard deviation; N, number of images quantified; SEM, standard error of the mean.

**Table S10.** Pairwise global alignment analysis of 3'-UTR sequences from selected transcripts with conserved and species-specific vegetal enrichment.

| conserved localization |                  |                      |        |             |             |
|------------------------|------------------|----------------------|--------|-------------|-------------|
| 3'-UTR                 | <i>X. laevis</i> | <i>X. tropicalis</i> | length | % identity  | % gaps      |
| <i>bicc1</i>           | NM_001095090     | CR855500             | 264    | 82,6        | 11,0        |
| <i>dazl</i>            | NM_001088303     | NM_203748            | 1441   | 46,2        | 45,9        |
| <i>dnd1</i>            | BC078132         | NM_001044434         | 824    | 49,4        | 38,7        |
| <i>gdf1</i>            | NM_001095591     | NM_001016819         | 1373   | 59,4        | 29,3        |
| <i>grip2</i>           | NM_001097913     | XM_002938230         | 2498   | 83,0        | 6,8         |
| <i>nanos1</i>          | NM_001088034     | NM_203526            | 1001   | 29,3        | 65,0        |
| <i>pgat</i>            | NM_001087463     | XM_002940115         | 3741   | 40,9        | 49,6        |
| <i>trim36</i>          | NM_001091117     | NM_001045780         | 1717   | 70,9        | 19,0        |
| <i>vegt</i>            | NM_001088196     | NM_203527            | 1284   | 81,8        | 7,9         |
| <i>velo1</i>           | NM_001089216     | CU075535             | 386    | 75,9        | 17,9        |
| <b>average</b>         |                  |                      |        | <b>61,9</b> | <b>29,1</b> |

  

| species-specific localization |                  |                      |        |             |             |
|-------------------------------|------------------|----------------------|--------|-------------|-------------|
| 3'-UTR                        | <i>X. laevis</i> | <i>X. tropicalis</i> | length | % identity  | % gaps      |
| <i>arl9</i>                   | NM_001096919     | NM_001016174         | 994    | 46,3        | 43,2        |
| <i>tob2</i>                   | NM_001090713     | NM_001016213         | 1754   | 79,4        | 11,9        |
| <i>ppp1r2</i>                 | NM_001097667     | CU075815             | 1671   | 69,6        | 21,5        |
| <i>tmem82</i>                 | NM_001094923     | NM_001016278         | 731    | 54,7        | 33,2        |
| <i>e2f1</i>                   | NM_001097139     | XM_002932857         | 1276   | 38,1        | 53,5        |
| <i>krt8</i>                   | NM_001087056     | NM_001002797         | 581    | 80,4        | 10,5        |
| <i>pxk</i>                    | NM_001096762     | XM_002935048         | 2596   | 44,3        | 44,1        |
| <i>tmem54</i>                 | BC058879         | XM_002940024         | 1181   | 39,6        | 51,9        |
| <i>rarres1</i>                | NM_001089741     | NM_001127974         | 2984   | 37,7        | 54,5        |
| <i>itm2a</i>                  | NM_001086092     | NM_001004833         | 1609   | 21,8        | 75,0        |
| <b>average</b>                |                  |                      |        | <b>51,2</b> | <b>39,9</b> |

3'-UTRs for pairwise global alignments were deduced from the indicated nucleotide sequence accessions.

## Supplementary References

Arthur, P.K., Claussen, M., Koch, S., Tarbashevich, K., Jahn, O., and Pieler, T. (2009). Participation of *Xenopus* Elr-type Proteins in Vegetal mRNA Localization during Oogenesis. *J Biol Chem* *284*, 19982-19992.

Berekelya, L.A., Ponomarev, M.B., Luchinskaya, N.N., and Belyavsky, A.V. (2003). *Xenopus* Germes encodes a novel germ plasm-associated transcript. *Gene expression patterns : GEP* *3*, 521-524.

Betley, J.N., Frith, M.C., Graber, J.H., Choo, S., and Deshler, J.O. (2002). A ubiquitous and conserved signal for RNA localization in chordates. *Curr Biol* *12*, 1756-1761.

Birsoy, B., Berg, L., Williams, P.H., Smith, J.C., Wylie, C.C., Christian, J.L., and Heasman, J. (2005). XPACE4 is a localized pro-protein convertase required for mesoderm induction and the cleavage of specific TGFbeta proteins in *Xenopus* development. *Development* *132*, 591-602.

Claussen, M., Horvay, K., and Pieler, T. (2004). Evidence for overlapping, but not identical, protein machineries operating in vegetal RNA localization along early and late pathways in *Xenopus* oocytes. *Development* *131*, 4263-4273.

Colozza, G., and De Robertis, E.M. (2014). Maternal syntabulin is required for dorsal axis formation and is a germ plasm component in *Xenopus*. *Differentiation* *88*, 17-26.

Cuykendall, T.N., and Houston, D.W. (2009). Vegetally localized *Xenopus* trim36 regulates cortical rotation and dorsal axis formation. *Development* *136*, 3057-3065.

D'Souza, A., Lee, M., Taverner, N., Mason, J., Carruthers, S., Smith, J.C., Amaya, E., Papalopulu, N., and Zorn, A.M. (2003). Molecular components of the endoderm specification pathway in *Xenopus tropicalis*. *Dev Dyn* *226*, 118-127.

Devic, E., Paquereau, L., Rizzoti, K., Monier, A., Knibiehler, B., and Audigier, Y. (1996). The mRNA encoding a beta subunit of heterotrimeric GTP-binding proteins is localized to the animal pole of *Xenopus laevis* oocyte and embryos. *Mech Dev* *59*, 141-151.

Houston, D.W., Zhang, J., Maines, J.Z., Wasserman, S.A., and King, M.L. (1998). A *Xenopus* DAZ-like gene encodes an RNA component of germ plasm and is a functional homologue of *Drosophila* boule. *Development* *125*, 171-180.

Hudson, C., and Woodland, H.R. (1998). Xpat, a gene expressed specifically in germ plasm and primordial germ cells of *Xenopus laevis*. *Mech Dev* *73*, 159-168.

Hudson, J.W., Alarcon, V.B., and Elinson, R.P. (1996). Identification of new localized RNAs in the *Xenopus* oocyte by differential display PCR. *Dev Genet* *19*, 190-198.

Kaneshiro, K., Miyauchi, M., Tanigawa, Y., Ikenishi, K., and Komiya, T. (2007). The mRNA coding for *Xenopus* glutamate receptor interacting protein 2 (XGRIP2) is maternally transcribed, transported through the late pathway and localized to the germ plasm. *Biochem Biophys Res Commun* *355*, 902-906.

King, M.L. (ed.) (1995). mRNA localization during frog oogenesis. Landes Publishing: Austin, TX.

Kloc, M., Dougherty, M.T., Bilinski, S., Chan, A.P., Brey, E., King, M.L., Patrick, C.W., Jr., and Etkin, L.D. (2002). Three-Dimensional Ultrastructural Analysis of RNA Distribution within Germinal Granules of *Xenopus*. *Dev Biol* *241*, 79-93.

Kloc, M., Reddy, B.A., Miller, M., Eastman, E., and Etkin, L.D. (1991). *x121*: a localized maternal transcript in *Xenopus laevis*. *Mol Reprod Dev* *28*, 341-345.

Kress, T.L., Yoon, Y.J., and Mowry, K.L. (2004). Nuclear RNP complex assembly initiates cytoplasmic RNA localization. *J Cell Biol* *165*, 203-211.

Ku, M., and Melton, D.A. (1993). *Xwnt-11*: a maternally expressed *Xenopus* wnt gene. *Development* *119*, 1161-1173.

Le Goff, C., Laurent, V., Le Bon, K., Tanguy, G., Couturier, A., Le Goff, X., and Le Guellec, R. (2006). *pEg6*, a spire family member, is a maternal gene encoding a vegetally localized mRNA in *Xenopus* embryos. *Biol Cell* *98*, 697-708.

MacArthur, H., Houston, D.W., Bubunencko, M., Mosquera, L., and King, M.L. (2000). *DEADSouth* is a germ plasm specific DEAD-box RNA helicase in *Xenopus* related to *eIF4A*. *Mech Dev* *95*, 291-295.

Meyer, D., Durliat, M., Senan, F., Wolff, M., Andre, M., Hourdry, J., and Remy, P. (1997). *Ets-1* and *Ets-2* proto-oncogenes exhibit differential and restricted expression patterns during *Xenopus laevis* oogenesis and embryogenesis. *Int J Dev Biol* *41*, 607-620.

Oberman, F., and Yisraeli, J.K. (1995). Two protocols for nonradioactive in situ hybridization to *Xenopus* oocytes. *Trends in genetics : TIG* *11*, 83-84.

Ossipova, O., He, X., and Green, J. (2002). Molecular cloning and developmental expression of *Par-1*/MARK homologues *XPar-1A* and *XPar-1B* from *Xenopus laevis*. *Gene expression patterns : GEP* *2*, 145-150.

Pannese, M., Cagliani, R., Pardini, C.L., and Boncinelli, E. (2000). *Xotx1* maternal transcripts are vegetally localized in *Xenopus laevis* oocytes. *Mech Dev* *90*, 111-114.

Reddy, B.A., Kloc, M., and Etkin, L.D. (1992). The cloning and characterization of a localized maternal transcript in *Xenopus laevis* whose zygotic counterpart is detected in the CNS. *Mech Dev* *39*, 143-150.

Roel, G., van den Broek, O., Spieker, N., Peterson-Maduro, J., and Destree, O. (2003). Tcf-1 expression during *Xenopus* development. *Gene expression patterns : GEP* 3, 123-126.

Schroeder, K.E., and Yost, H.J. (1996). *Xenopus* poly (A) binding protein maternal RNA is localized during oogenesis and associated with large complexes in blastula. *Dev Genet* 19, 268-276.

Sekizaki, H., Takahashi, S., Tanegashima, K., Onuma, Y., Haramoto, Y., and Asashima, M. (2004). Tracing of *Xenopus tropicalis* germ plasm and presumptive primordial germ cells with the *Xenopus tropicalis* DAZ-like gene. *Dev Dyn* 229, 367-372.

Tarbashevich, K., Dzementsei, A., and Pieler, T. (2011). A novel function for KIF13B in germ cell migration. *Dev Biol* 349, 169-178.

Tarbashevich, K., Koebernick, K., and Pieler, T. (2007). XGRIP2.1 is encoded by a vegetally localizing, maternal mRNA and functions in germ cell development and anteroposterior PGC positioning in *Xenopus laevis*. *Dev Biol* 311, 554-565.

Vick, P., Schweickert, A., Weber, T., Eberhardt, M., Mencl, S., Shcherbakov, D., Beyer, T., and Blum, M. (2009). Flow on the right side of the gastrocoel roof plate is dispensable for symmetry breakage in the frog *Xenopus laevis*. *Dev Biol* 331, 281-291.

Wang, H.W., Fang, J.S., Kuang, X., Miao, L.Y., Wang, C., Xia, G.L., King, M.L., and Zhang, J. (2012). Activity of long-chain acyl-CoA synthetase is required for maintaining meiotic arrest in *Xenopus laevis*. *Biology of reproduction* 87, 74.

Weeks, D.L., and Melton, D.A. (1987a). A maternal mRNA localized to the animal pole of *Xenopus* eggs encodes a subunit of mitochondrial ATPase. *Proc Natl Acad Sci U S A* 84, 2798-2802.

Weeks, D.L., and Melton, D.A. (1987b). A maternal mRNA localized to the vegetal hemisphere in *Xenopus* eggs codes for a growth factor related to TGF-beta. *Cell* 51, 861-867.

Wessely, O., and De Robertis, E.M. (2000). The *Xenopus* homologue of Bicaudal-C is a localized maternal mRNA that can induce endoderm formation. *Development* 127, 2053-2062.

Whitfield, T., Heasman, J., and Wylie, C. (1993). XLPOU-60, a *Xenopus* POU-domain mRNA, is oocyte-specific from very early stages of oogenesis, and localised to presumptive mesoderm and ectoderm in the blastula. *Dev Biol* 155, 361-370.

Zearfoss, N.R., Chan, A.P., Wu, C.F., Kloc, M., and Etkin, L.D. (2004). Hermes is a localized factor regulating cleavage of vegetal blastomeres in *Xenopus laevis*. *Dev Biol* 267, 60-71.

Zhang, J., and King, M.L. (1996). *Xenopus* VegT RNA is localized to the vegetal cortex during oogenesis and encodes a novel T-box transcription factor involved in mesodermal patterning. *Development* 122, 4119-4129.

Zhang, Q., Yaniv, K., Oberman, F., Wolke, U., Git, A., Fromer, M., Taylor, W.L., Meyer, D., Standart, N., Raz, E., and Yisraeli, J.K. (1999). Vg1 RBP intracellular distribution and evolutionarily conserved expression at multiple stages during development. *Mech Dev* *88*, 101-106.

Zhou, Y., Zhang, J., and King, M.L. (2004). Polarized distribution of mRNAs encoding a putative LDL receptor adaptor protein, xARH (autosomal recessive hypercholesterolemia) in *Xenopus* oocytes. *Mech Dev* *121*, 1249-1258.
